# Supplementary material
Source: MDPI journal article supplement (https://www.mdpi.com/2813-3323/1/3/12)
Supplement: s1 [file s1]

**Table S1.** Voucher codes, GenBank accession numbers and references to the original publications for the specimens used in the phylogeny reconstruction.

| Collection Number | Species                                                                     | GenBank  | Reference                      | Remarks                                                    |
|-------------------|-----------------------------------------------------------------------------|----------|--------------------------------|------------------------------------------------------------|
| RMNH.Crus.D.53762 | <i>Cryptochirus coralliodytes</i> Heller, 1861                              | KU041822 | van der Meij and Nieman, 2016  |                                                            |
| RMNH.Crus.D.53782 | <i>Dacryomaia</i> cf. <i>edmonsoni</i> (Fize & Serène, 1956)                | KJ923669 | van der Meij and Reijnen, 2014 |                                                            |
| RMNH.Crus.D.54184 | <i>Fizesereneia heimi</i> (Fize & Serène, 1956)                             | KU041831 | van der Meij and Nieman, 2016  |                                                            |
| RMNH.Crus.D.54186 | <i>Fizesereneia latisella</i> Kropp, 1994                                   | KU041832 | van der Meij and Nieman, 2016  |                                                            |
| RMNH.Crus.D.54425 | <i>Fizesereneia panda</i> van der Meij, 2015                                | KM491175 | van der Meij et al., 2015      |                                                            |
| RMNH.Crus.D.53232 | <i>Fungicola fagei</i> (Fize and Serène, 1956)                              | KJ923644 | van der Meij and Reijnen, 2014 |                                                            |
| RMNH.Crus.D.53220 | <i>Fungicola syzygia</i> van der Meij, 2015                                 | KP192980 | van der Meij, 2015a            |                                                            |
| RMNH.Crus.D.53230 | <i>Fungicola utinomi</i> (Fize and Serène, 1956)                            | KP192984 | van der Meij, 2015a            |                                                            |
| RMNH.Crus.D.53697 | <i>Hapalocarcinus marsupialis</i> s.l. Stimpson, 1859                       | KJ923654 | van der Meij and Reijnen, 2014 | see Bähr et al. (2021) for details on this species complex |
| RMNH.Crus.D.54266 | <i>Hiroia krempfi</i> (Fize & Serène, 1956)                                 | KU041834 | van der Meij and Nieman, 2016  |                                                            |
| RMNH.Crus.D.54989 | <i>Kroppcarcinus siderastreicola</i> Badaro, Neves, Castro & Johnsson, 2012 | KU041837 | van der Meij and Nieman, 2016  |                                                            |
| RMNH.Crus.D.58325 | <i>Lithoscaptus aquarius</i> sp. nov.                                       | OR051026 | this study                     |                                                            |
| RMNH.Crus.D.53899 | <i>Lithoscaptus</i> cf. <i>helleri</i> (Fize & Serène, 1957)                | KU041824 | van der Meij and Nieman, 2016  |                                                            |

|                   |                                                          |          |                                |
|-------------------|----------------------------------------------------------|----------|--------------------------------|
| RMNH.Crus.D.54021 | <i>Lithoscaptus paradoxus</i> A. Milne-Edwards, 1862     | KU041825 | van der Meij and Nieman, 2016  |
| RMNH.Crus.D.53715 | <i>Lithoscaptus prionotus</i> Kropp, 1994                | KJ923664 | van der Meij and Reijnen, 2014 |
| RMNH.Crus.D.54331 | <i>Lithoscaptus semperi</i> van der Meij, 2015           | KP688583 | van der Meij, 2015b            |
| RMNH.Crus.D.54065 | <i>Lithoscaptus</i> sp. A                                | KU041828 | van der Meij and Nieman, 2016  |
| RMNH.Crus.D.54054 | <i>Lithoscaptus</i> sp. C                                | KU041827 | van der Meij and Nieman, 2016  |
| RMNH.Crus.D.53783 | <i>Lithoscaptus</i> sp. D                                | KU041823 | van der Meij and Nieman, 2016  |
| RMNH.Crus.D.54175 | <i>Lithoscaptus</i> sp. Z                                | KU041830 | van der Meij and Nieman, 2016  |
| RMNH.Crus.D.53994 | <i>Lithoscaptus tri</i> (Fize & Serène, 1956)            | KJ923673 | van der Meij and Reijnen, 2014 |
| RMNH.Crus.D.53713 | <i>Neotroglocarcinus dawydoffi</i> (Fize & Serène, 1956) | KJ923663 | van der Meij and Reijnen, 2014 |
| RMNH.Crus.D.54252 | <i>Neotroglocarcinus hongkongensis</i> (Shen, 1936)      | KJ923690 | van der Meij and Reijnen, 2014 |
| RMNH.Crus.D.53648 | <i>Opecarcinus cathyae</i> van der Meij, 2014            | KM396420 | van der Meij, 2014             |
| RMNH.Crus.D.56094 | <i>Opecarcinus hypostegus</i> (Shaw & Hopkins, 1977)     | KU041838 | van der Meij and Nieman, 2016  |
| RMNH.Crus.D.53766 | <i>Opecarcinus lobifrons</i> Kropp, 1989                 | KJ923666 | van der Meij and Reijnen, 2014 |
| RMNH.Crus.D.54200 | <i>Opecarcinus pholeter</i> Kropp, 1989                  | KU041833 | van der Meij and Nieman, 2016  |
| RMNH.Crus.D.54037 | <i>Pelycomaia minuta</i> (Edmonson, 1933)                | KU041826 | van der Meij and Nieman, 2016  |

|                   |                                                          |          |                                |          |
|-------------------|----------------------------------------------------------|----------|--------------------------------|----------|
| RMNH.Crus.D.54049 | <i>Pseudocryptochirus viridis</i> Hiro, 1938             | KJ923677 | van der Meij and Reijnen, 2014 |          |
| RMNH.Crus.D.54298 | <i>Pseudohapalocarcinus ransonii</i> Fize & Serène, 1956 | KJ923668 | van der Meij and Reijnen, 2014 |          |
| RMNH.Crus.D.54285 | <i>Sphenomaia pyriformis</i> (Edmonson, 1933)            | KJ923693 | van der Meij and Reijnen, 2014 |          |
| RMNH.Crus.D.54981 | <i>Troglocarcinus corallicola</i> Verrill, 1908          | KU041836 | van der Meij and Nieman, 2016  |          |
| RMNH.Crus.D.54006 | <i>Utinomiella dimorpha</i> (Henderson, 1906)            | KJ923674 | van der Meij and Reijnen, 2014 |          |
| RMNH.Crus.D.54100 | <i>Xynomaia sheni</i> (Fize & Serène, 1956)              | KJ923679 | van der Meij and Reijnen, 2014 |          |
| RMNH.Crus.D.54910 | <i>Xynomaia</i> sp.                                      | KU041835 | van der Meij and Nieman, 2016  |          |
| RMNH.Crus.D.51736 | <i>Hemigrapsus penicillatus</i> (de Haan, 1835)          | KJ923643 | van der Meij and Reijnen, 2014 | outgroup |

## References

1. Bähr, S., Johnson, M.L., Berumen, M.L., Hardenstine, R.S., Rich, W.A., van der Meij, S.E.T. 2021. Morphology and reproduction in the *Hapalocarcinus marsupialis* Stimpson, 1859 species complex (Decapoda:Brachyura: Cryptochiridae). *J. Crustacean Biol.* **2021**, 41, ruab052.
2. van der Meij, S.E.T. A new species of *Opecarcinus* Kropp and Manning, 1987 (Crustacea: Brachyura: Cryptochiridae) associated with the stony corals *Pavona clavus* (Dana, 1846) and *P. bipartita* Nemenzo, 1980 (Scleractinia: Agariciidae). *Zootaxa*, **2014**, 3869, 44–52.
3. van der Meij, S.E.T.; Reijnen, B.T. The curious case of *Neotroglocarcinus dawydoffi* (Decapoda, Cryptochiridae): unforeseen biogeographic patterns resulting from isolation. *System Biodivers*, **2014**, 12, 503–512.
4. van der Meij, S.E.T.; Berumen, M.L.; Paulay, G. A new species of *Fizesereneia* Takeda & Tamura, 1980 (Crustacea: Brachyura: Cryptochiridae) from the Red Sea and Oman. *Zootaxa*. **2015**, 3931, 585–595.
5. van der Meij, S.E.T. Host relations and DNA reveal a cryptic gall crab species (Crustacea: Decapoda: Cryptochiridae) associated with mushroom corals (Scleractinia: Fungiidae). *Contributions to Zoology*. **2015**, 84, 39–57b.
6. van der Meij, S.E.T. A new gall crab species (Brachyura, Cryptochiridae) associated with the free-living coral *Trachyphyllia geoffroyi* (Scleractinia, Merulinidae). *ZooKeys*. **2015**, 500, 61–72.
7. van der Meij, S.E.T.; Nieman, A.M. Old and new DNA unweave the phylogenetic position of the eastern Atlantic gall crab *Detocarcinus balssi* (Monod, 1956)(Decapoda: Cryptochiridae). *J. Zool. Syst. Evol.Res.* **2016**, 54, 189–196.
